# Supplementary material for: The Impact of the Definitions of Clinical Phases on the Profiles of Grey-Zone Patients with Chronic Hepatitis B Virus Infection
Source: MDPI journal article supplement (doi:10.3390/v15051212), 2023-05-22
Supplement: s1 [file s1]

### Supplementary Figure S1 Flowchart of patient selection

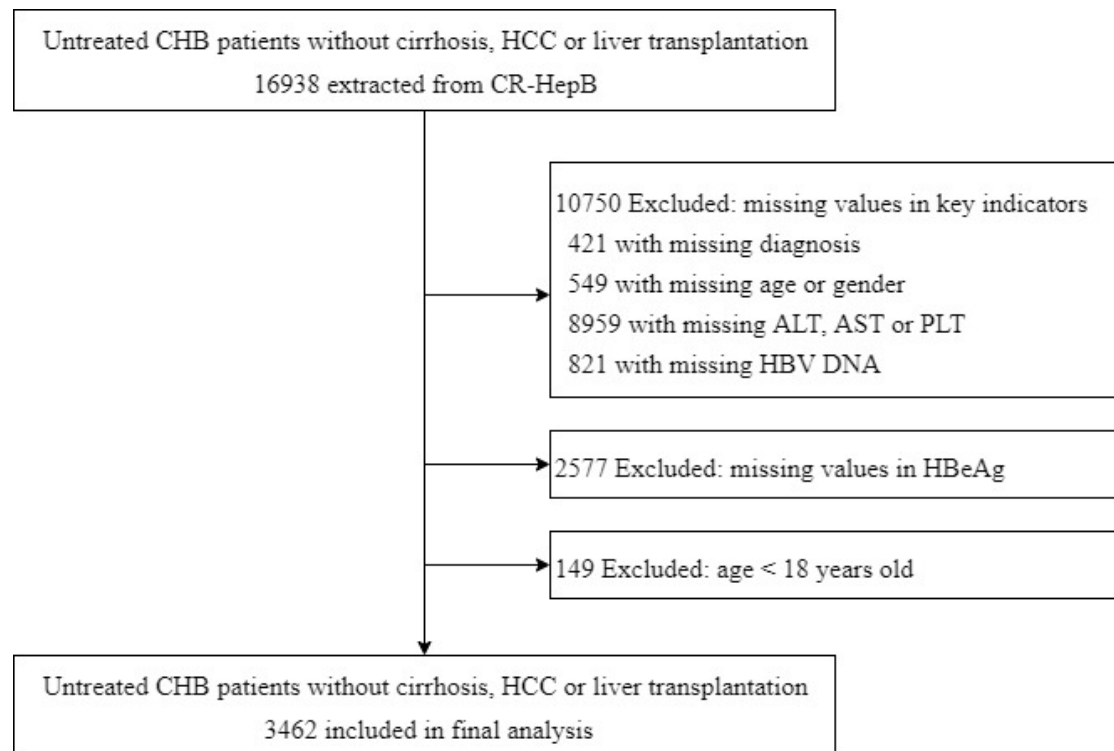

ALT, alanine aminotransferase; AST, aspartate aminotransferase; HBeAg, hepatitis B e antigen; HBV, hepatitis B virus; HCC, hepatocellular carcinoma; PLT, platelet

**Supplementary Table S1 Patient characteristics**

|                              | <b>Total population</b> |
|------------------------------|-------------------------|
| Age                          | 40.6 (31.3, 50.5)       |
| % Male                       | 2224 (64.2)             |
| % HBeAg-positive             | 1802 (52.1)             |
| PLT ( $\times 10^9/L$ )      | 188.0 (143.0, 229.0)    |
| ALT (U/L)                    | 39.0 (24.0, 78.0)       |
| AST (U/L)                    | 31.0 (23.0, 56.0)       |
| Alb (g/L)                    | 43.7 (40.0, 46.3)       |
| TBil ( $\mu\text{mol/L}$ )   | 15.1 (11.4, 22.0)       |
| HBV DNA ( $\log_{10}$ IU/mL) | 4.5 (3.0, 6.8)          |
| APRI                         | 0.4 (0.3, 1.0)          |
| % APRI $\geq 1.5$            | 592 (17.1)              |
| FIB-4, Median                | 1.2 (0.7, 2.1)          |
| % FIB-4 $\geq 3.25$          | 523 (15.1)              |

Abbreviations: ALT, alanine aminotransferase; APRI, AST to platelet ratio; AST, aspartate aminotransferase; FIB-4, fibrosis score based on four factors; HBeAg, hepatitis B e antigen; HBsAg, hepatitis B surface antigen; HBV, hepatitis B virus; PLT, platelet; TBil, total bilirubin.

Values are presented as number (%) for categorical variables or median (IQR) for continuous variables.

**Supplementary Table S2 Characteristics of the inconsistent grey zone<sup>a</sup> patients as per the AASLD 2018 alone and the CSH/CSID 2022 alone**

|                              | Inconsistent grey-zone patients |                      | <i>p</i> Value |
|------------------------------|---------------------------------|----------------------|----------------|
|                              | As per the AASLD                | As per the CSH/CSID  |                |
|                              | 2018 alone<br>N=777             | 2022 alone<br>N=250  |                |
| Age                          | 38.2 (30.2, 49.3)               | 42.2 (33.2, 49.3)    | 0.010          |
| % Male                       | 599 (77.1)                      | 167 (66.8)           | 0.002          |
| % HBeAg positive             | 485 (62.4)                      | 82 (32.8)            | <0.001         |
| PLT ( $\times 10^9/L$ )      | 187.0 (138.0, 229.0)            | 191.0 (150.0, 229.8) | 0.372          |
| ALT (U/L)                    | 48.0 (42.0, 60.0)               | 21.0 (16.0, 26.0)    | <0.001         |
| AST (U/L)                    | 34.0 (28.0, 46.0)               | 21.6 (18.2, 26.0)    | <0.001         |
| Alb (g/L)                    | 44.3 (40.9, 46.9)               | 45 (42.1, 47.3)      | 0.015          |
| TBil ( $\mu\text{mol/L}$ )   | 15.46 (11.7, 21.7)              | 13.5 (9.7, 18.5)     | <0.001         |
| HBV DNA ( $\log_{10}$ IU/mL) | 4.9 (3.6, 7.4)                  | 3.0 (2.5, 6.4)       | <0.001         |
| APRI                         | 0.5 (0.3, 0.8)                  | 0.3 (0.2, 0.4)       | <0.001         |
| % APRI $\geq 1.5$            | 112 (14.4)                      | 2 (0.8)              | <0.001         |
| FIB-4                        | 1.1 (0.6, 2.0)                  | 1.0 (0.7, 1.6)       | 0.931          |
| % FIB-4 $\geq 3.25$          | 107 (13.8)                      | 17 (6.8)             | 0.005          |

Abbreviations: AASLD, American Association for the Study of Liver Diseases; ALT, alanine aminotransferase; APRI, AST to platelet ratio; AST, aspartate aminotransferase; CSH/CSID, The Chinese Society of Hepatology and Chinese Society of Infectious Disease; FIB-4, fibrosis score based on four factors; HBeAg, hepatitis B e antigen; HBsAg, hepatitis B surface antigen; HBV, hepatitis B virus; PLT, platelet; Tbil, total bilirubin.

Values are presented as number (%) for categoric variables or median (IQR) for continuous variables.

<sup>a</sup> Inconsistent grey-zone patients referred to the grey-zone patients excluding those consistently defined as grey-zone by both guidelines.

**Supplementary Table S3 Distribution of clinical phases with varying ALT ULN values as per the AASLD 2018 and the CSH/CSID 2022**

|                      | <b>Phase 1</b> | <b>Phase 2</b> | <b>Phase 3</b> | <b>Phase 4</b> | <b>Grey Zone</b> |
|----------------------|----------------|----------------|----------------|----------------|------------------|
|                      | <b>n (%)</b>     |
| <b>AASLD 2018</b>    |                |                |                |                |                  |
| ALT 50/40 U/L        | 456 (13.2)     | 393 (11.4)     | 514 (14.9)     | 172 (5.0)      | 1927 (55.7)      |
| ALT 40/40 U/L        | 384 (11.1)     | 452 (13.1)     | 463 (13.4)     | 219 (6.3)      | 1944 (56.2)      |
| ALT 35/25 U/L        | 274 (7.9)      | 562 (16.2)     | 386 (11.2)     | 269 (7.8)      | 1971 (56.9)      |
| ALT 30/19 U/L        | 195 (5.6)      | 671 (19.4)     | 301 (8.7)      | 322 (9.3)      | 1973 (57.0)      |
| <b>CSH/CSID 2022</b> |                |                |                |                |                  |
| ALT 50/40 U/L        | 312 ( 9.0)     | 833 (24.1)     | 287 (8.3)      | 415 (12.0)     | 1615 (46.7)      |
| ALT 40/40 U/L        | 273 (7.9)      | 966 (27.9)     | 257 (7.4)      | 522 (15.1)     | 1444 (41.7)      |
| ALT 35/25 U/L        | 192 (5.6)      | 1156 (33.4)    | 218 (6.3)      | 708 (20.5)     | 1188 (34.3)      |
| ALT 30/19 U/L        | 135 (3.9)      | 1280 (37.0)    | 171 (4.9)      | 880 (25.4)     | 996 (28.8)       |

Abbreviations: AASLD, American Association for the Study of Liver Diseases; ALT, alanine aminotransferase; CSH/CSID, The Chinese Society of Hepatology and Chinese Society of Infectious Disease
